# Supplementary material for: Renin–angiotensin–aldosterone system inhibitors and survival in patients with hypertension treated with immune checkpoint inhibitors
Source: PubMed Central journal article supplement (PMC9618285; doi:10.1016/j.ejca.2021.12.024), 2022-01-19

## SUPPLEMENTAL MATERIAL

This appendix has been provided by the authors to give readers additional information about their work

### Supplement to **Renin-Angiotensin-Aldosterone System Inhibitors and Survival in Patients Treated with Immune Checkpoint Inhibitors**

Zsofia D. Drobni, MD<sup>1,2</sup>, Olivier Michielin MD, PhD<sup>3,4</sup>, Thiago Quinaglia MD<sup>2</sup>, Daniel A. Zlotoff, MD PhD<sup>5</sup>, Leyre Zubiri, MD PhD<sup>6</sup>, Hannah K Gilman, BS<sup>2</sup>, Sama Supraja, BS<sup>2</sup>, Bela Merkely, MD<sup>1</sup>, Veronika Muller, MD<sup>7</sup>, Ryan J. Sullivan, MD<sup>6</sup>, Kerry L. Reynolds, MD<sup>6</sup>, Michael J. Pittet, PhD<sup>8</sup>, Rakesh K. Jain, PhD<sup>9</sup>, Tomas G. Neilan, MD, MPH<sup>2,5</sup>

1, Heart and Vascular Center, Semmelweis University, Budapest, Hungary

2, Cardiovascular Imaging Research Center (CIRC), Department of Radiology and Division of Cardiology, Massachusetts General Hospital, Harvard Medical School, Boston, MA, USA

3, Oncology Department, Precision Oncology Center, Lausanne, Switzerland

4, Oncology Department, Lausanne University Hospital, Lausanne, Switzerland

5, Cardio-Oncology Program, Division of Cardiology, Department of Medicine, Massachusetts General Hospital, Harvard Medical School, Boston, Massachusetts

6, Division of Oncology and Hematology, Department of Medicine, Massachusetts General Hospital, Harvard Medical School, Boston, MA, USA

7, Department of Pulmonology, Semmelweis University, Budapest, Hungary

8, Department of Pathology and Immunology, University of Geneva, Geneva, Switzerland

9, Edwin L. Steele Laboratories, Department of Radiation Oncology, Massachusetts General Hospital and Harvard Medical School, Boston, MA, USA

## Table of Contents

|                                                                                                                                                                                                                                                                                                                                                    |          |
|----------------------------------------------------------------------------------------------------------------------------------------------------------------------------------------------------------------------------------------------------------------------------------------------------------------------------------------------------|----------|
| <i>Supplementary Table 1. Baseline characteristics of cases and controls. Cases: patients treated with a renin-angiotensin aldosterone system inhibitors for hypertension. Controls: patients treated with non- renin-angiotensin aldosterone system inhibitors for hypertension. Patients without available date of death were excluded. ....</i> | <i>3</i> |
| <i>Supplementary Figure 1. Kaplan Meier curves of the survival probability in each cancer type in the full cohort. ....</i>                                                                                                                                                                                                                        | <i>5</i> |
| <i>Supplementary Figure 2. Kaplan Meier curves of the survival probability in all types of cancer, genitourinary and gastrointestinal, excluding those who died but no date of death available. ....</i>                                                                                                                                           | <i>6</i> |
| <i>Supplementary Figure 3. Kaplan Meier curves of the survival probability in Kaplan Meier curves of the survival probability in all types of cancer, genitourinary and gastrointestinal in the propensity score matched cohort.....</i>                                                                                                           | <i>7</i> |

**Supplementary Table 1. Baseline characteristics of cases and controls. Cases: patients treated with a renin-angiotensin aldosterone system inhibitors for hypertension. Controls: patients treated with non- renin-angiotensin aldosterone system inhibitors for hypertension. Patients without available date of death were excluded.**

|                                             | <b>Cases<br/>(N = 3,426)</b> |         | <b>Controls<br/>(N = 2,484)</b> |         | <b>P Value</b> |         |
|---------------------------------------------|------------------------------|---------|---------------------------------|---------|----------------|---------|
| <b>Demographic</b>                          |                              |         |                                 |         |                |         |
| Sex – no. (%)                               |                              |         |                                 |         |                |         |
| Male                                        | 1,897                        | (61)    | 1,244                           | (55)    | < 0.001        |         |
| Female                                      | 1,207                        | (39)    | 1,003                           | (46)    |                |         |
| Age – yrs mean. (SD)                        | 68                           | (10)    | 66                              | (12)    | < 0.001        |         |
| Race or ethnic group – no. (%)              |                              |         |                                 |         |                |         |
| White                                       | 2,823                        | (93)    | 2,046                           | (93)    | 0.9            |         |
| Asian                                       | 77                           | (2.5)   | 60                              | (2.7)   |                |         |
| Black or African American                   | 85                           | (2.8)   | 58                              | (2.6)   |                |         |
| Other                                       | 57                           | (1.9)   | 47                              | (2.1)   |                |         |
| <b>Clinical variables – mean. (SD)</b>      |                              |         |                                 |         |                |         |
| Body mass index - kg/m <sup>2</sup>         | 28.13                        | (6.11)  | 26.78                           | (5.74)  | < 0.001        |         |
| Systolic blood pressure - mmHg              | 132.3                        | (19.05) | 126.5                           | (17.91) | < 0.001        |         |
| <b>Cancer types – no. (%)</b>               |                              |         |                                 |         |                |         |
| Breast                                      | 78                           | (2.6)   | 90                              | (4.1)   | < 0.001        |         |
| Gastrointestinal                            | 345                          | (12)    | 243                             | (11)    |                |         |
| Genitourinary                               | 449                          | (15)    | 247                             | (11)    |                |         |
| Gynecological                               | 150                          | (5.0)   | 68                              | (3.1)   |                |         |
| Head and Neck                               | 262                          | (8.7)   | 189                             | (8.7)   |                |         |
| Hematological                               | 100                          | (3.3)   | 91                              | (4.2)   |                |         |
| Melanoma                                    | 508                          | (17)    | 333                             | (15)    |                |         |
| Neurological                                | 95                           | (3.2)   | 114                             | (5.3)   |                |         |
| Sarcoma                                     | 25                           | (0.8)   | 21                              | (1.0)   |                |         |
| Thoracic                                    | 1,987                        | (33)    | 773                             | (36)    |                |         |
| <b>Cardiovascular risk factors – no (%)</b> |                              |         |                                 |         |                |         |
| Diabetes mellitus                           | 852                          | (27)    | 284                             | (13)    |                | < 0.001 |
| Smoking current or prior                    | 1,183                        | (38)    | 913                             | (41)    |                | 0.062   |
| Hyperlipidemia                              | 1,923                        | (62)    | 1,047                           | (47)    |                | < 0.001 |
| Renal disease                               | 604                          | (19)    | 279                             | (12)    | < 0.001        |         |
| <b>Cardiovascular medications – no. (%)</b> |                              |         |                                 |         |                |         |
| Beta-blockers                               | 1,729                        | (56)    | 1,651                           | (73)    | < 0.001        |         |
| Calcium channel blockers                    | 1,237                        | (40)    | 785                             | (35)    | < 0.001        |         |
| Statins                                     | 1,900                        | (61)    | 917                             | (41)    | < 0.001        |         |
| Aspirin                                     | 1,685                        | (54)    | 875                             | (39)    | < 0.001        |         |
| <b>Prior cancer therapy – no. (%)</b>       |                              |         |                                 |         |                |         |
| Anthracyclines                              | 155                          | (5.0)   | 107                             | (4.8)   | 0.7            |         |
| 5 fluorouracil                              | 326                          | (11)    | 199                             | (8.9)   | 0.046          |         |
| Platin based therapy                        | 1,264                        | (41)    | 939                             | (42)    | 0.4            |         |

| <b>Immune checkpoint inhibitor type – no. (%)</b>                      |       |          |       |          | <b>&lt; 0.001</b> |
|------------------------------------------------------------------------|-------|----------|-------|----------|-------------------|
| <i>Monotherapy</i>                                                     |       |          |       |          |                   |
| Programmed death-ligand-1                                              | 446   | (14)     | 261   | (12)     |                   |
| Cytotoxic-T-Lymphocyte associated protein 4                            | 130   | (4.2)    | 63    | (2.8)    |                   |
| Programmed death-protein 1                                             | 2,299 | (74)     | 1,740 | (77)     |                   |
| <i>Combination therapy</i>                                             |       |          |       |          |                   |
| Cytotoxic-T-Lymphocyte associated protein 4/Programmed death protein 1 | 229   | (7.4)    | 183   | (8.1)    |                   |
| Number of cycles of ICI – no, (IQR)                                    | 5     | (2 – 11) | 5     | (2 – 10) | 0.2               |

**Supplementary Figure 1. Kaplan Meier curves of the survival probability in each cancer type in the full cohort. (Results for any type of cancer, gastrointestinal and genitourinary are reported in the main manuscript)**

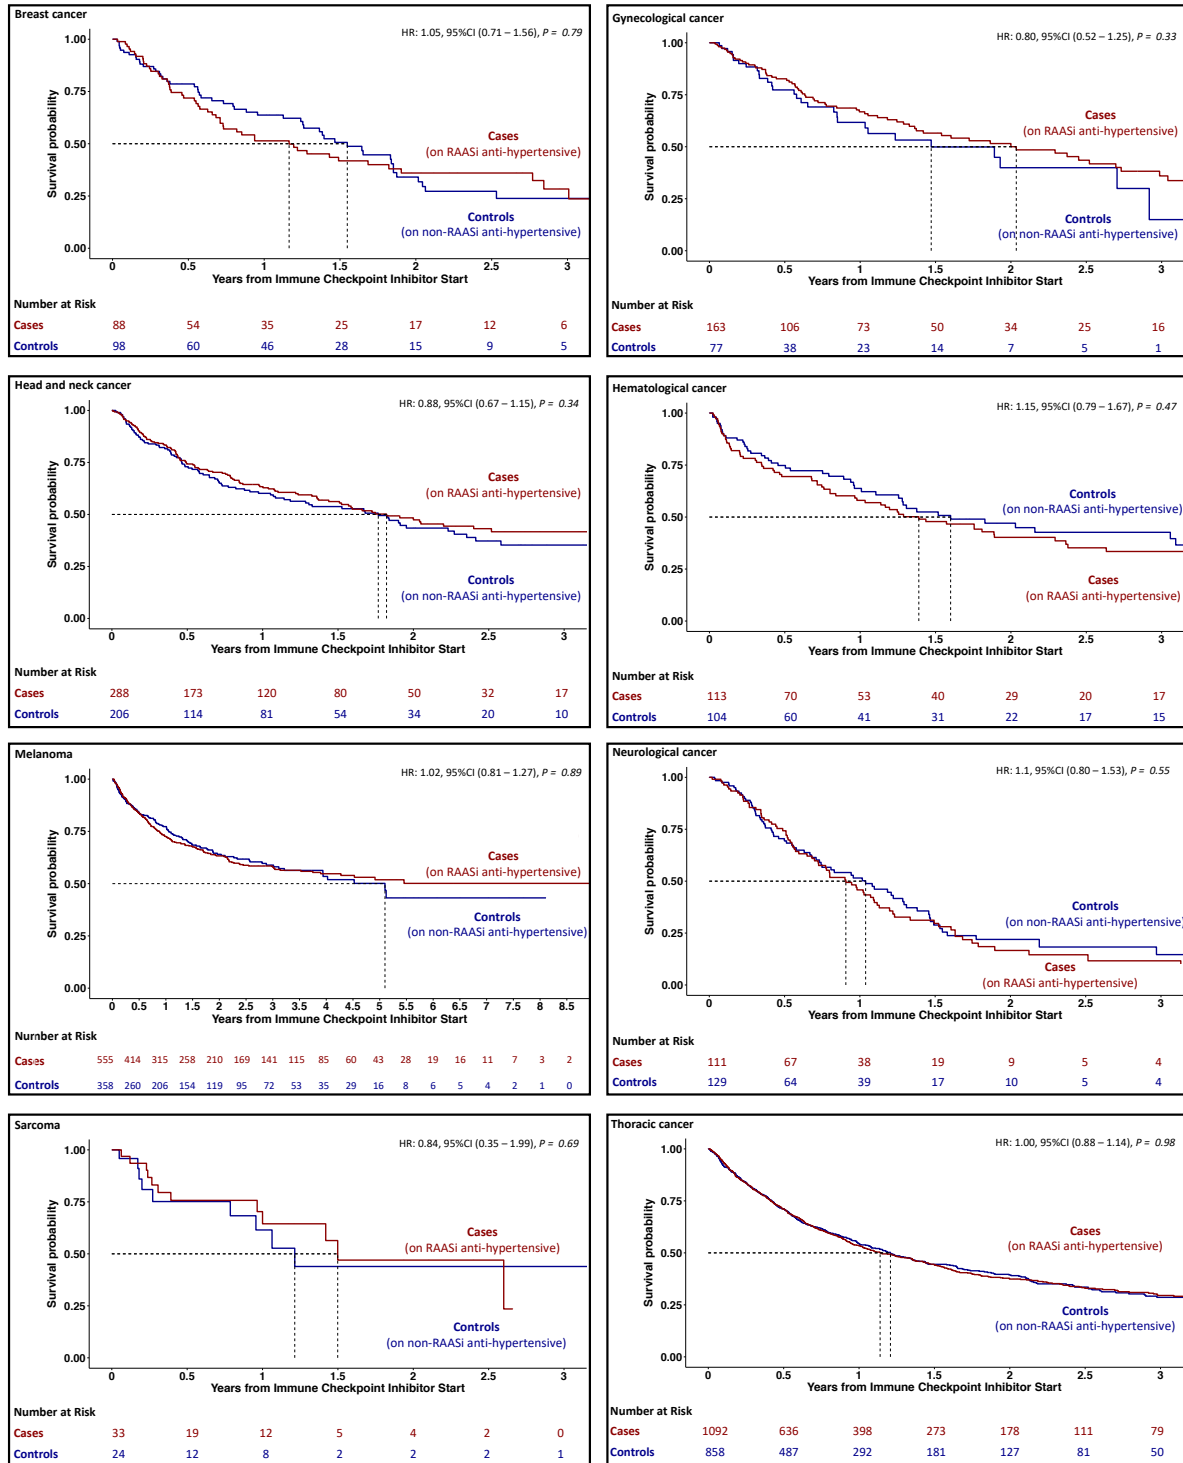

**Supplementary Figure 2. Kaplan Meier curves of the survival probability in all types of cancer, genitourinary and gastrointestinal, excluding those who died but no date of death available. \*: Adjusted hazard ratios for age, gender, body mass index, congestive heart failure, diabetes, renal disease, liver disease and smoking.**

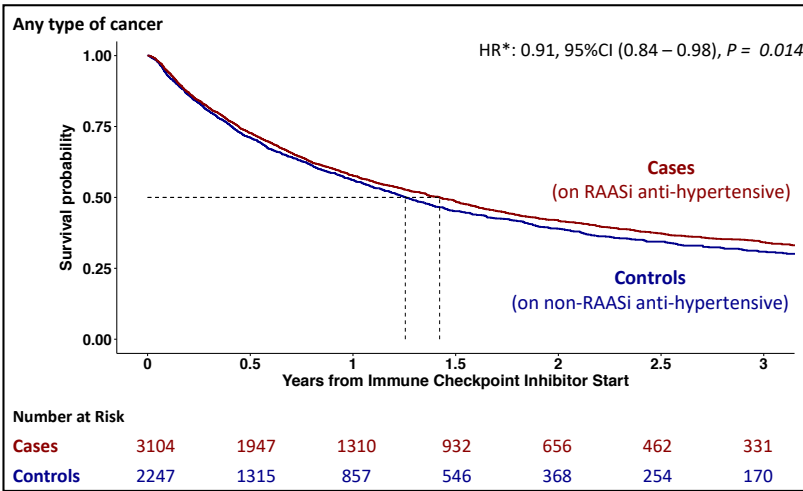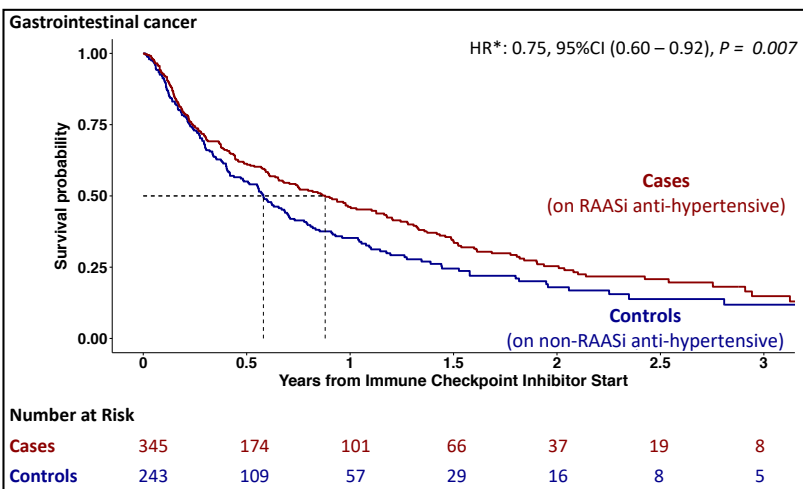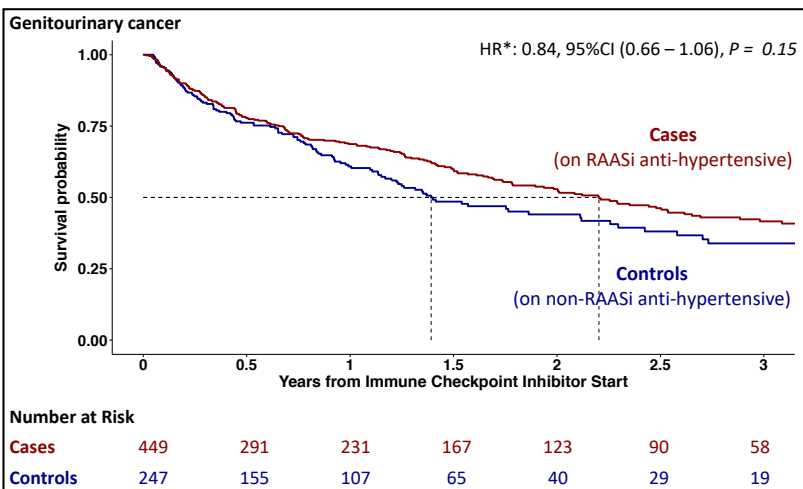

**Supplementary Figure 3. Kaplan Meier curves of the survival probability in Kaplan Meier curves of the survival probability in all types of cancer, genitourinary and gastrointestinal in the propensity score matched cohort. \*** Adjusted hazard ratios for age, gender, body mass index, congestive heart failure, diabetes, renal disease, liver disease and smoking.

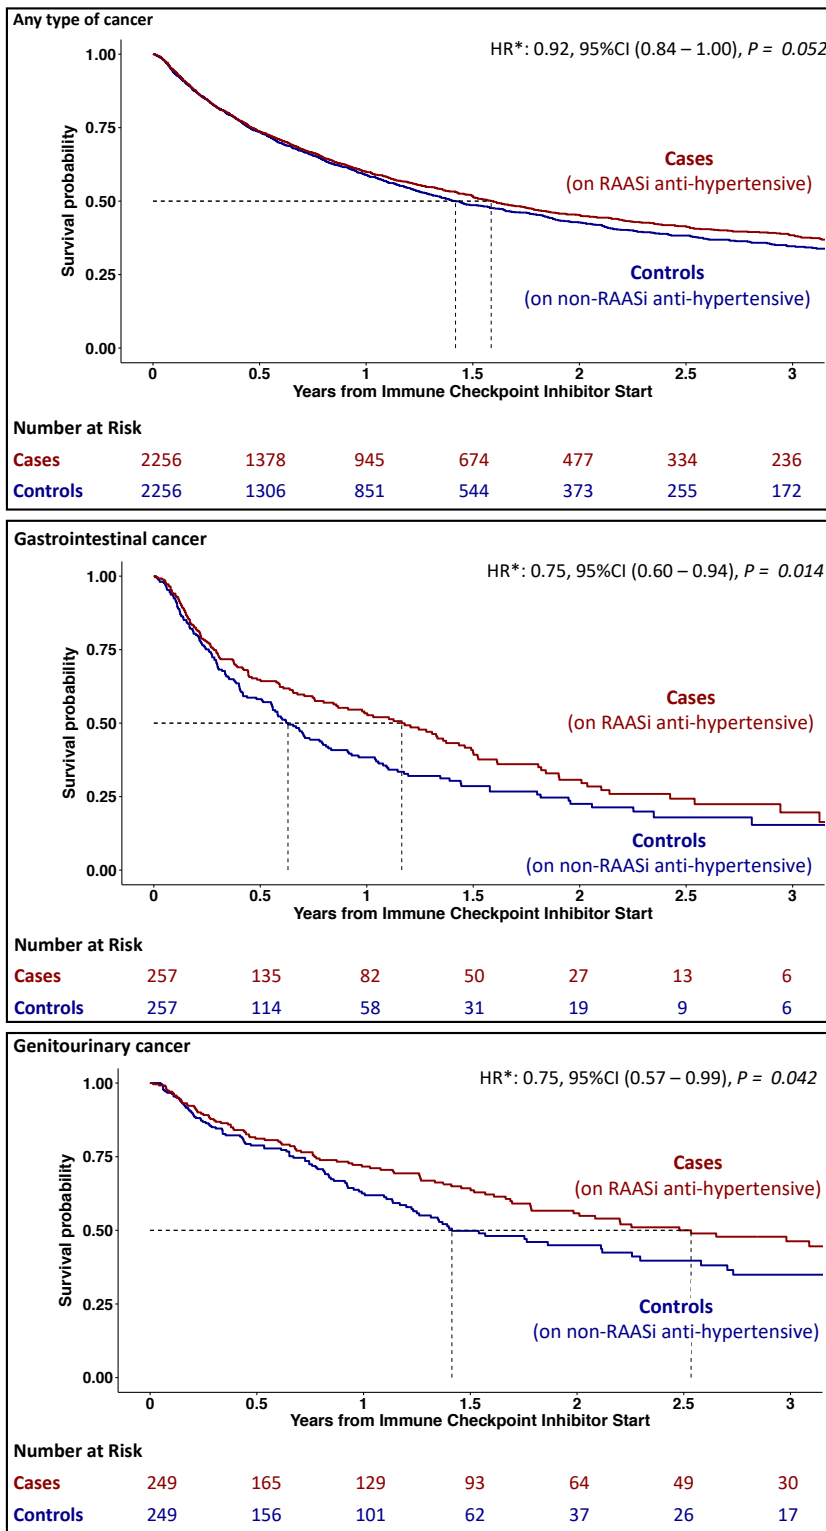

Supplement: NIHMS1843272-supplement-Supplemental_Material.pdf [file NIHMS1843272-supplement-Supplemental_Material.pdf]
